# Supplementary material
Source: PubMed Central journal article supplement (PMC5962376)
Supplement: NIHMS925198-supplement-Supplemental_Digital_Content_to_Be_Published__cited_in_text_.pdf [file NIHMS925198-supplement-Supplemental_Digital_Content_to_Be_Published__cited_in_text_.pdf]

**Supplemental Table S1. List of opioid medications**

| Medications                     |
|---------------------------------|
| GUAIFENESIN/HYDROCODONE BIT     |
| HYDROCODONE BIT                 |
| HYDROCODONE BIT/ACETAMINOPHEN   |
| HYDROCODONE BIT/HOMATROPINE     |
| HYDROCODONE TANNATE/CHLOR-TAN   |
| HYDROCODONE/CHLORPHEN POLIS     |
| HYDROCODONE/IBUPROFEN           |
| P-EPD TAN/HYDROCODONE TANNATE   |
| P-EPHED HCL/HYDROCODONE BIT     |
| P-EPHED HCL/HYDROCODONE/BPM     |
| P-EPHED HCL/HYDROCODONE/CP      |
| P-EPHED HCL/HYDROCODONE/TRIPRO  |
| PE/HYDROCODONE/DEXBROMPHENIRMIN |
| PHENYLEPHRINE HCL/HYDROCODONE   |
| PHENYLEPHRINE/HYDROCODONE/BPM   |
| PHENYLEPHRINE/HYDROCODONE/CP    |
| PHENYLEPHRINE/HYDROCODONE/D-CP  |
| PHENYLEPHRINE/HYDROCODONE/DPHA  |
| PHENYLEPHRINE/HYDROCODONE/PYR   |
| POT GUAIAICO/HYDROCODONE BIT    |
| PPA HCL/HYDROCODONE BIT         |
| IBUPROFEN/OXYCODONE HCL         |
| OXYCODONE HCL                   |
| OXYCODONE HCL/ACETAMINOPHEN     |
| OXYCODONE HCL/ASPIRIN           |
| OXYCODONE HCL/OXYCODON TER/ASA  |
| PROPOXYPHENE HCL                |
| PROPOXYPHENE HCL/ACETAMINOPHEN  |
| PROPOXYPHENE HCL/ASA/CAFFEINE   |
| PROPOXYPHENE NAPSYL             |
| PROPOXYPHENE/ACETAMINOPHEN      |
| TRAMADOL HCL                    |
| TRAMADOL HCL/ACETAMINOPHEN      |
| ACETAMINOPHEN WITH CODEINE      |
| ASPIRIN/CODEINE PHOSPHATE       |
| BROMPHENIRAMIN/PE/CODEINE PHOS  |
| CHLORPHENIRAMINE/CODEINE PHOS   |
| CODEINE PHOS/CARISOPRODOL/ASA   |
| CODEINE PHOSPHATE               |
| CODEINE SULF                    |
| CODEINE/BUTALBIT/ACETAMIN/CAFF  |
| CODEINE/BUTALBITAL/ASA/CAFFEIN  |
| CODEINE/PROMETHAZINE HCL        |
| DIPHENHYDRAMIN/PE/CODEINE PHOS  |

GUAIFENESIN/CODEINE PHOS  
P-EPHED HCL/CODEINE/GUAIFEN  
MORPHINE SULFATE  
MORPHINE SULFATE/D5W/PF  
MORPHINE SULFATE/NALTREXONE  
MORPHINE SULFATE/PF  
HYDROMORPHONE HCL  
HYDROMORPHONE HCL/PF  
METHADONE HCL  
MEPERIDINE HCL  
MEPERIDINE HCL/PF  
OXYMORPHONE HCL  
BUPRENORPHINE HCL  
BUPRENORPHINE HCL/NALOXONE HCL  
TAPENTADOL HYDROCHLORIDE  
FENTANYL  
FENTANYL CITRATE  
FENTANYL CITRATE/PF

---

**Supplemental Table S2. ICD-9-CM codes prescribed to identify cancer- and pain-related hospitalization**

| <b>Disease</b> | <b>ICD-9-CM codes</b>                                             | <b>Description</b>                                                                                       |
|----------------|-------------------------------------------------------------------|----------------------------------------------------------------------------------------------------------|
| Cancer         | 140.XX                                                            | Malignant neoplasm of lip                                                                                |
|                | 141.XX                                                            | Malignant neoplasm of tongue                                                                             |
|                | 142.XX                                                            | Malignant neoplasm of major salivary glands                                                              |
|                | 143.XX                                                            | Malignant neoplasm of gum                                                                                |
|                | 144.XX                                                            | Malignant neoplasm of floor of mouth                                                                     |
|                | 145.XX                                                            | Malignant neoplasm of other and unspecified parts of mouth                                               |
|                | 146.XX                                                            | Malignant neoplasm of oropharynx                                                                         |
|                | 147.XX                                                            | Malignant neoplasm of nasopharynx                                                                        |
|                | 148.XX                                                            | Malignant neoplasm of hypopharynx                                                                        |
|                | 149.XX                                                            | Malignant neoplasm of other and ill-defined sites within the lip, oral cavity, and pharynx               |
|                | 150.XX                                                            | Malignant neoplasm of esophagus                                                                          |
|                | 151.XX                                                            | Malignant neoplasm of stomach                                                                            |
|                | 152.XX                                                            | Malignant neoplasm of small intestine, including duodenum                                                |
|                | 153.XX                                                            | Malignant neoplasm of colon                                                                              |
|                | 154.XX                                                            | Malignant neoplasm of rectum, rectosigmoid junction, and anus                                            |
|                | 155.XX                                                            | Malignant neoplasm of liver and intrahepatic bile ducts                                                  |
|                | 156.XX                                                            | Malignant neoplasm of gallbladder and extrahepatic bile ducts                                            |
|                | 157.XX                                                            | Malignant neoplasm of pancreas                                                                           |
|                | 158.XX                                                            | Malignant neoplasm of retroperitoneum and peritoneum                                                     |
|                | 159.XX                                                            | Malignant neoplasm of other and ill-defined sites within the digestive organs and peritoneum             |
|                | 160.XX                                                            | Malignant neoplasm of nasal cavities, middle ear, and accessory prescriptions                            |
|                | 161.XX                                                            | Malignant neoplasm of larynx                                                                             |
|                | 162.XX                                                            | Malignant neoplasm of trachea, bronchus, and lung                                                        |
|                | 163.XX                                                            | Malignant neoplasm of pleura                                                                             |
|                | 164.XX                                                            | Malignant neoplasm of thymus, heart, and mediastinum                                                     |
|                | 165.XX                                                            | Malignant neoplasm of other and ill-defined sites within the respiratory system and intrathoracic organs |
|                | 170.XX                                                            | Malignant neoplasm of bone and articular cartilage                                                       |
|                | 171.XX                                                            | Malignant neoplasm of connective and other soft tissue                                                   |
|                | 172.XX                                                            | Malignant melanoma of skin                                                                               |
|                | 173.XX                                                            | Other and unspecified malignant neoplasm of skin                                                         |
|                | 174.XX                                                            | Malignant neoplasm of female breast                                                                      |
|                | 175.XX                                                            | Malignant neoplasm of male breast                                                                        |
|                | 176.XX                                                            | Kaposi's sarcoma                                                                                         |
|                | 179.XX                                                            | Malignant neoplasm of uterus, part unspecified                                                           |
| 180.XX         | Malignant neoplasm of cervix uteri                                |                                                                                                          |
| 181.XX         | Malignant neoplasm of placenta                                    |                                                                                                          |
| 182.XX         | Malignant neoplasm of body of uterus                              |                                                                                                          |
| 183.XX         | Malignant neoplasm of ovary and other uterine adnexa              |                                                                                                          |
| 184.XX         | Malignant neoplasm of other and unspecified female genital organs |                                                                                                          |

|      |        |                                                                                            |
|------|--------|--------------------------------------------------------------------------------------------|
|      | 185.XX | Malignant neoplasm of prostate                                                             |
|      | 186.XX | Malignant neoplasm of testis                                                               |
|      | 187.XX | Malignant neoplasm of penis and other male genital organs                                  |
|      | 188.XX | Malignant neoplasm of bladder                                                              |
|      | 189.XX | Malignant neoplasm of kidney and other and unspecified urinary organs                      |
|      | 190.XX | Malignant neoplasm of eye                                                                  |
|      | 191.XX | Malignant neoplasm of brain                                                                |
|      | 192.XX | Malignant neoplasm of other and unspecified parts of nervous system                        |
|      | 193.XX | Malignant neoplasm of thyroid gland                                                        |
|      | 194.XX | Malignant neoplasm of other endocrine glands and related structures                        |
|      | 195.XX | Malignant neoplasm of other and ill-defined sites                                          |
|      | 196.XX | Secondary and unspecified malignant neoplasm of lymph nodes                                |
|      | 197.XX | Secondary malignant neoplasm of respiratory and digestive systems                          |
|      | 198.XX | Secondary malignant neoplasm of other specified sites                                      |
|      | 199.XX | Malignant neoplasm without specification of site                                           |
|      | 200.XX | Lymphosarcoma and reticulosarcoma and other specified malignant tumors of lymphatic tissue |
|      | 201.XX | Hodgkin's disease                                                                          |
|      | 202.XX | Other malignant neoplasms of lymphoid and histiocytic tissue                               |
|      | 203.XX | Multiple myeloma and immunoproliferative neoplasms                                         |
|      | 204.XX | Lymphoid leukemia                                                                          |
|      | 205.XX | Myeloid leukemia                                                                           |
|      | 206.XX | Monocytic leukemia                                                                         |
|      | 207.XX | Other specified leukemia                                                                   |
|      | 208.XX | Leukemia of unspecified cell type                                                          |
| Pain | 307.80 | Psychogenic pain, site unspecified                                                         |
|      | 338.2X | Chronic pain                                                                               |
|      | 338.3X | Neoplasm related pain (acute) (chronic)                                                    |
|      | 338.4X | Chronic pain syndrome                                                                      |
|      | 388.70 | Otalgia, unspecified                                                                       |
|      | 524.62 | Arthralgia of temporomandibular joint                                                      |
|      | 525.9  | Unspecified disorder of the teeth and supporting structures                                |
|      | 569.42 | Anal or rectal pain                                                                        |
|      | 607.9  | Unspecified disorder of penis                                                              |
|      | 608.9  | Unspecified disorder of male genital organs                                                |
|      | 611.71 | Mastodynia                                                                                 |
|      | 625.9  | Unspecified symptom associated with female genital organs                                  |
|      | 719.4X | Pain in joint                                                                              |
|      | 723.1  | Cervicalgia                                                                                |
|      | 724.2  | Lumbago                                                                                    |
|      | 724.5  | Backache, unspecified                                                                      |
|      | 724.6  | Other and unspecified disorders of back: disorders of sacrum                               |
|      | 724.79 | Other and unspecified disorders of back: disorders of coccyx, other                        |
|      | 729.1  | Myalgia and myositis, unspecified                                                          |
|      | 729.5  | Pain in limb                                                                               |
|      | 733.9  | Other and unspecified disorders of bone and cartilage                                      |
|      | 780.96 | Generalized pain                                                                           |

|        |                |
|--------|----------------|
| 784.0  | Headache       |
| 784.1  | Throat pain    |
| 784.92 | Jaw pain       |
| 786.5  | Chest pain     |
| 789.0X | Abdominal pain |

---

X = 0 to 9 inclusive

ICD-9-CM = International Classification of Diseases, Ninth Revision, Clinical Modification

**Supplemental Table S3. ICD-9-CM codes prescribed to identify mental health-related hospitalization**

| <b>Mental illness</b>                         | <b>ICD-9-CM codes</b>                                                                                                                                                                                                                                                       |
|-----------------------------------------------|-----------------------------------------------------------------------------------------------------------------------------------------------------------------------------------------------------------------------------------------------------------------------------|
| <b>Depression and affective disorders</b>     | 296.XX, 298.0, 300.4, 301.12, 309.0, 309.1, 311, V79.0                                                                                                                                                                                                                      |
| <b>Organic disorders and dementias</b>        | 290.XX, 293.XX, 294.XX, 310.XX, 331.0, 331.1X, 331.2, 797                                                                                                                                                                                                                   |
| <b>Alcohol-related disorders</b>              | 291.XX, 303.XX, 305.0X, 571.0, 571.1, 571.2, 571.3, 790.3, V11.3, V79.1                                                                                                                                                                                                     |
| <b>Drug disorders not alcohol related</b>     | 292.XX, 304.XX, 305.XX (excluded 305.0X)                                                                                                                                                                                                                                    |
| <b>Schizophrenic disorders</b>                | 295.XX, V11.0                                                                                                                                                                                                                                                               |
| <b>Other psychoses</b>                        | 297.X, 298.X (excluded 298.0), 299.XX                                                                                                                                                                                                                                       |
| <b>Anxiety and personality disorders</b>      | 300.XX (excluded 300.4), 301.XX (excluded 301.12), 307.4X, 307.8X, 308.X, 309.81, 312.3X, 316, V11.1, V11.2                                                                                                                                                                 |
| <b>Other mental disorders (not psychoses)</b> | 278.0X, 302.XX, 306.XX, 307.XX (excluded 307.4X and 307.8X), 309.XX (excluded 309.0, 309.1, 309.81), 312.XX (excluded 312.3X), 313.XX, 314.XX, 315.XX, 317, 318.X, 319, 780.1, 783.0, 783.6, 799.2X, V11.8, V11.9, V15.4X, V40.XX, V66.3, V67.3, V70.1, V70.2, V79.2, V79.3 |

X = 0 to 9 inclusive.

ICD-9-CM = International Classification of Diseases, Ninth Revision, Clinical Modification.
